# Supplementary material
Source: PubMed Central journal article supplement (PMC5038064)
Supplement: IAI.00348-16_zii999091831so1.pdf [file IAI.00348-16_zii999091831so1.pdf]

S1A.

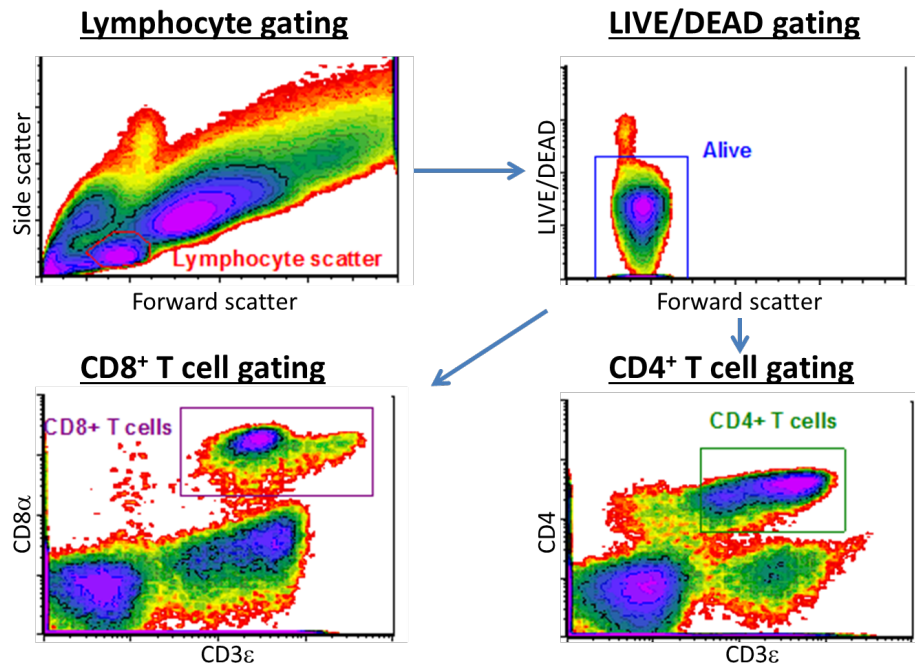

S1B. Uninfected

Day 7

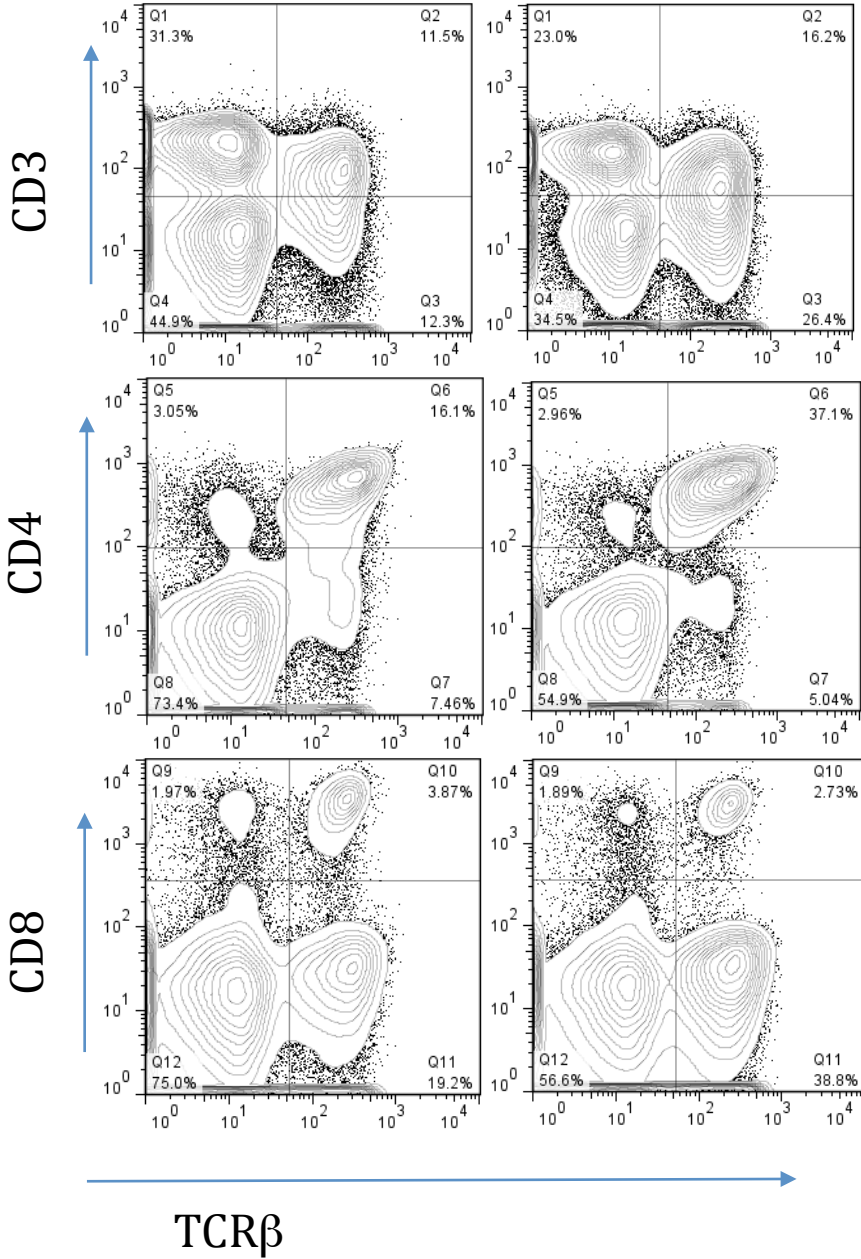

S1C. Uninfected

Day 7

LP  $\alpha\beta$  CD4<sup>+</sup>  
T Cells

LP  $\alpha\beta$  CD8<sup>+</sup>  
T Cells

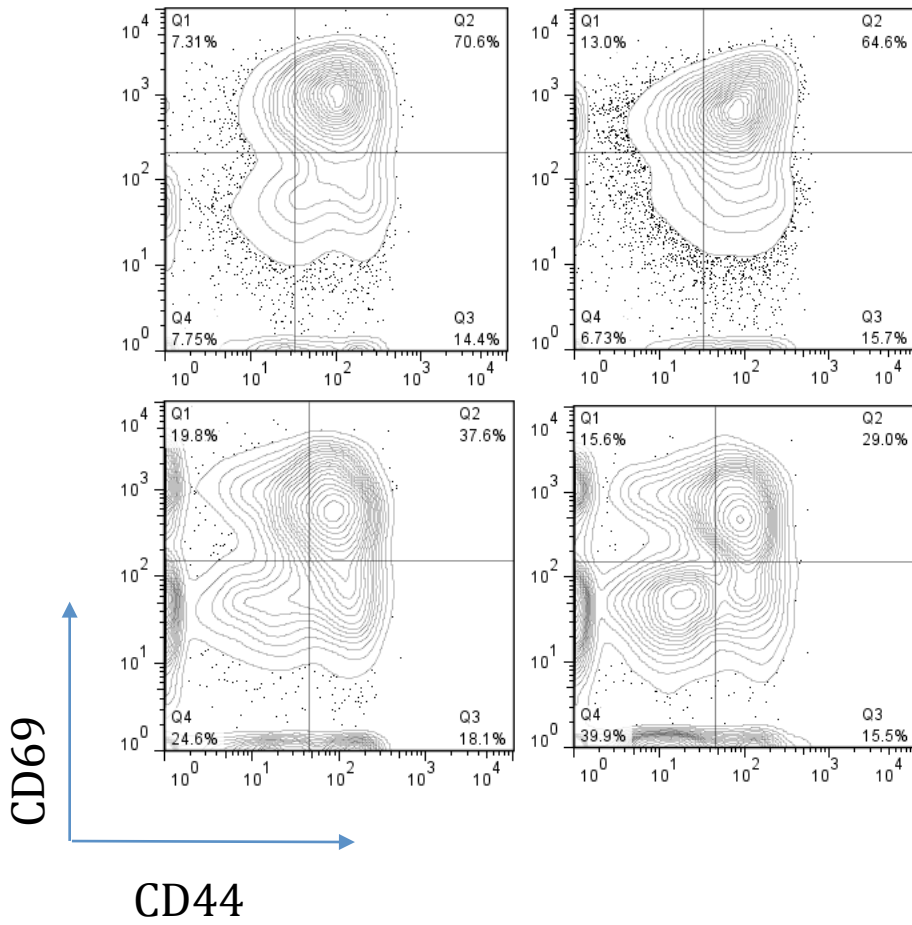

## $\gamma\delta$ T cells

S1D.

Uninfected

Day 7

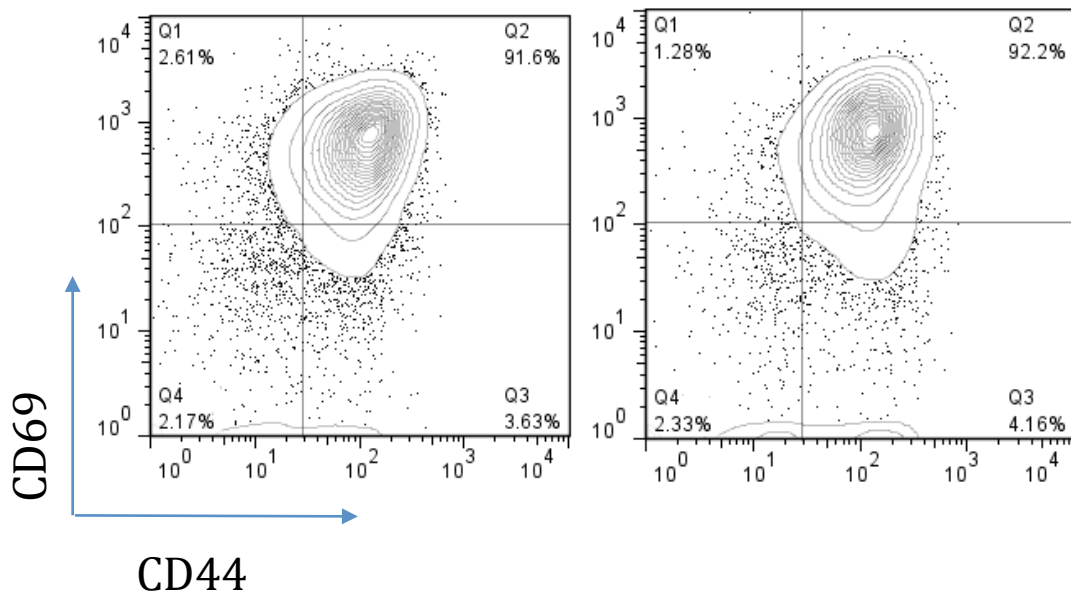

Supplemental Figure 1. Gating strategy and repeat of T cell analysis from uninfected and 7-day infected C57BL/6J mice that received autoclaved drinking water without antibiotics. Lamina propria from four mice per group were pooled and lymphocytes isolated as described in Materials & Methods. Cells were stained with the indicated antibodies. In all experiments and shown in A, cells isolated from percoll gradients were gated based on forward and size scatter, then on cell viability, and finally using specific antibodies. In B, total T cells, CD4 and CD8 populations are shown as proportions of all viable cells. In C, expression of the activation markers CD44 and CD69 are shown on gated populations of CD4<sup>+</sup> and CD8<sup>+</sup>, Tcr $\beta$ <sup>+</sup> T cells. In D, expression of the activation markers CD44 and CD69 are shown on gated populations of total  $\gamma\delta$  (CD3<sup>+</sup>Tcr $\beta$ <sup>-</sup>) T cells.

S2A. Uninfected

Day 7

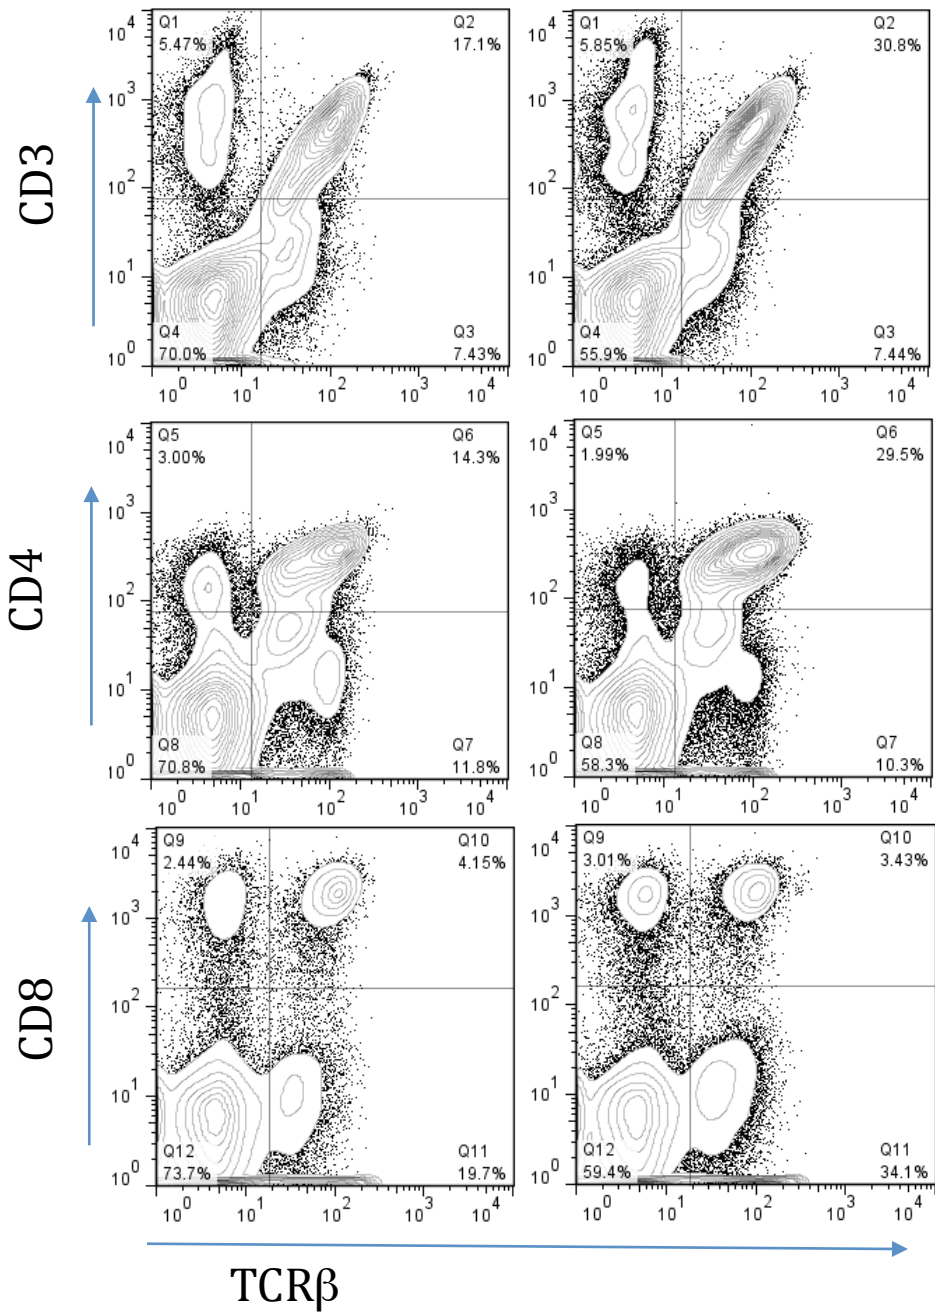

S2B. Uninfected LP Day 7

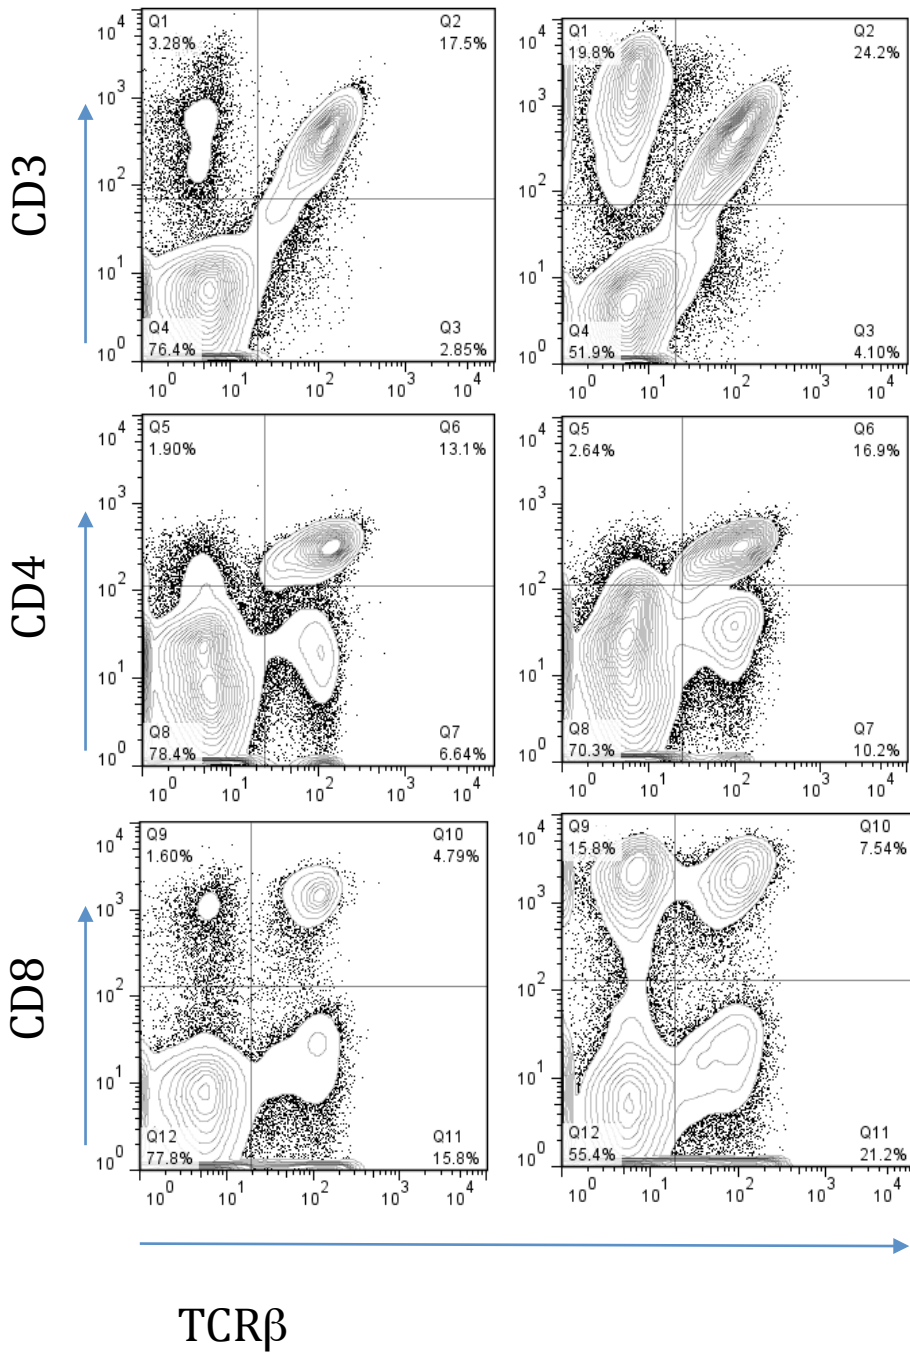

IEL

S2C. Uninfected

Day 7

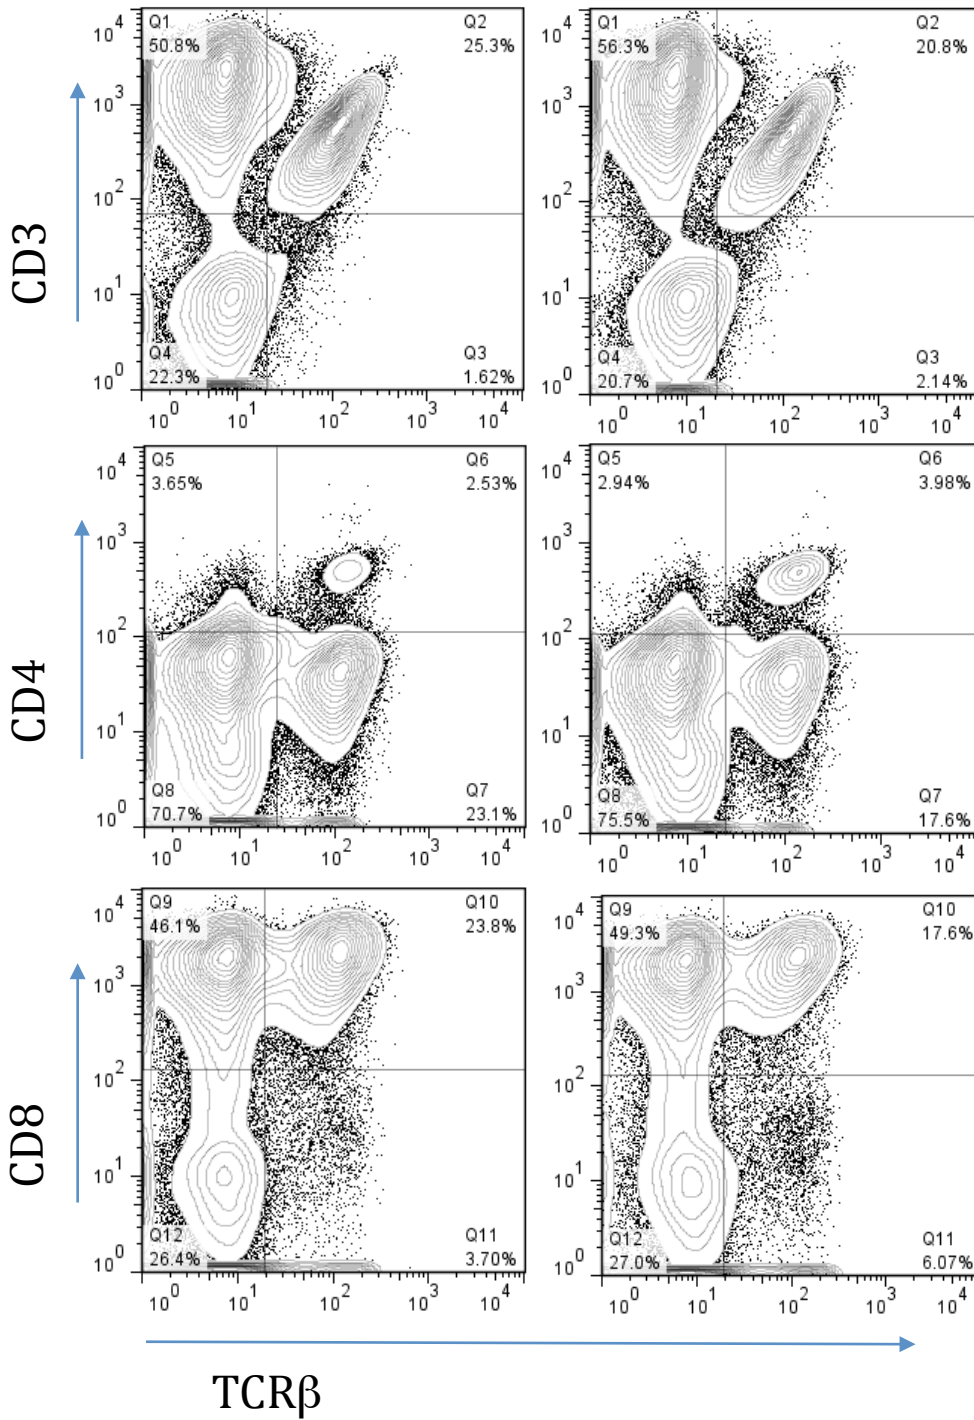

S2D. Uninfected

Day 7

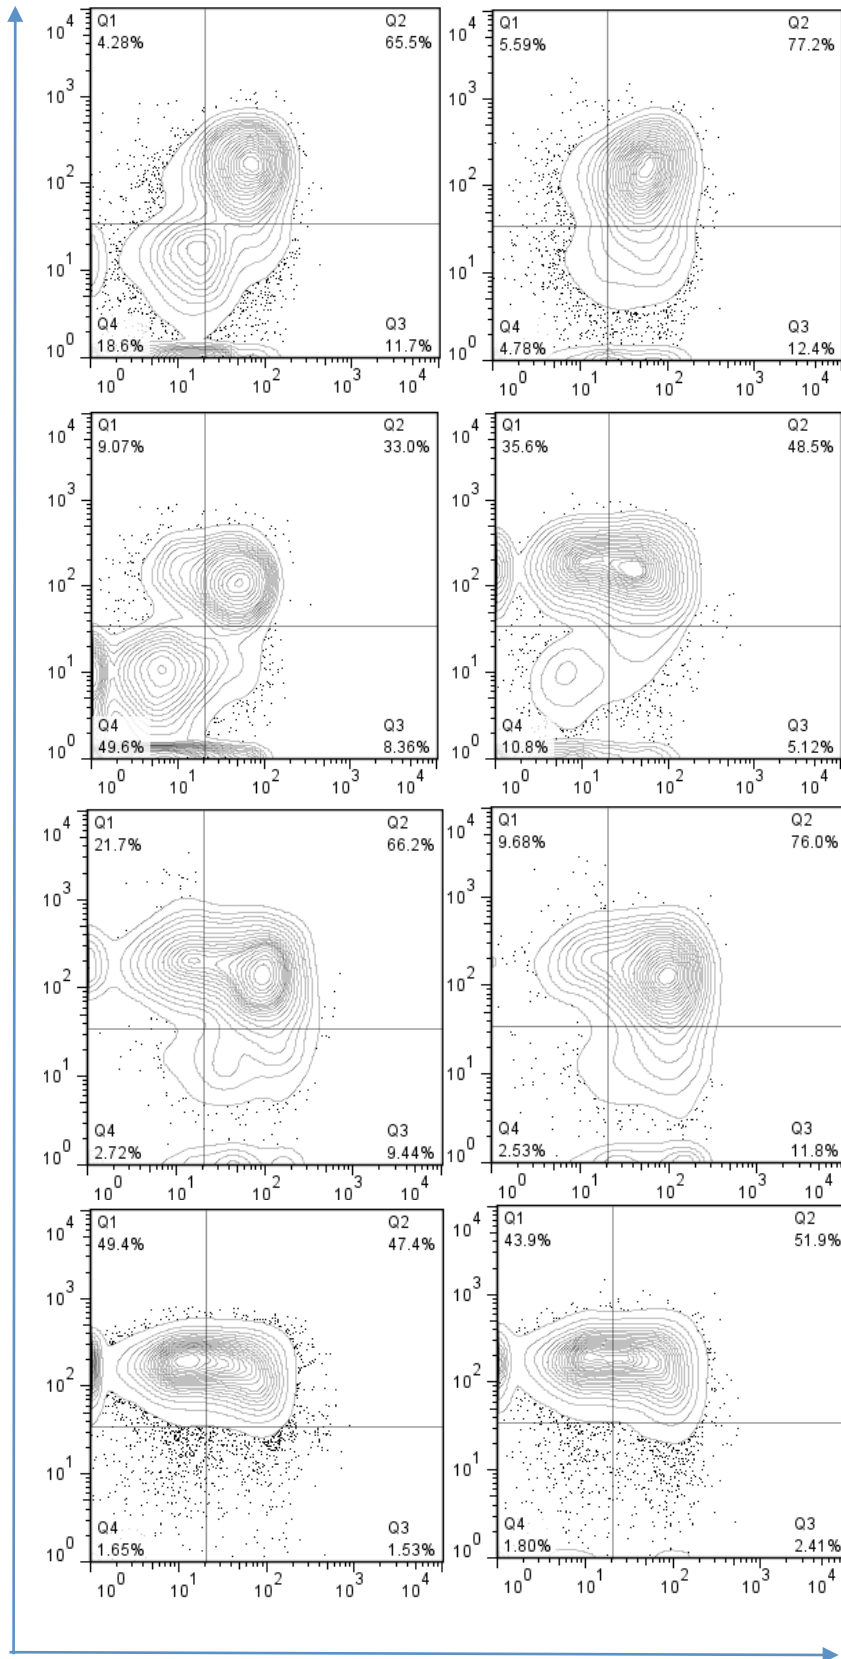

LP CD4+ T cells

LP CD8+ T cells

IEL CD4+ T cells

IEL CD8+ T cells

CD69

CD44



S2E. Uninfected

Day 7

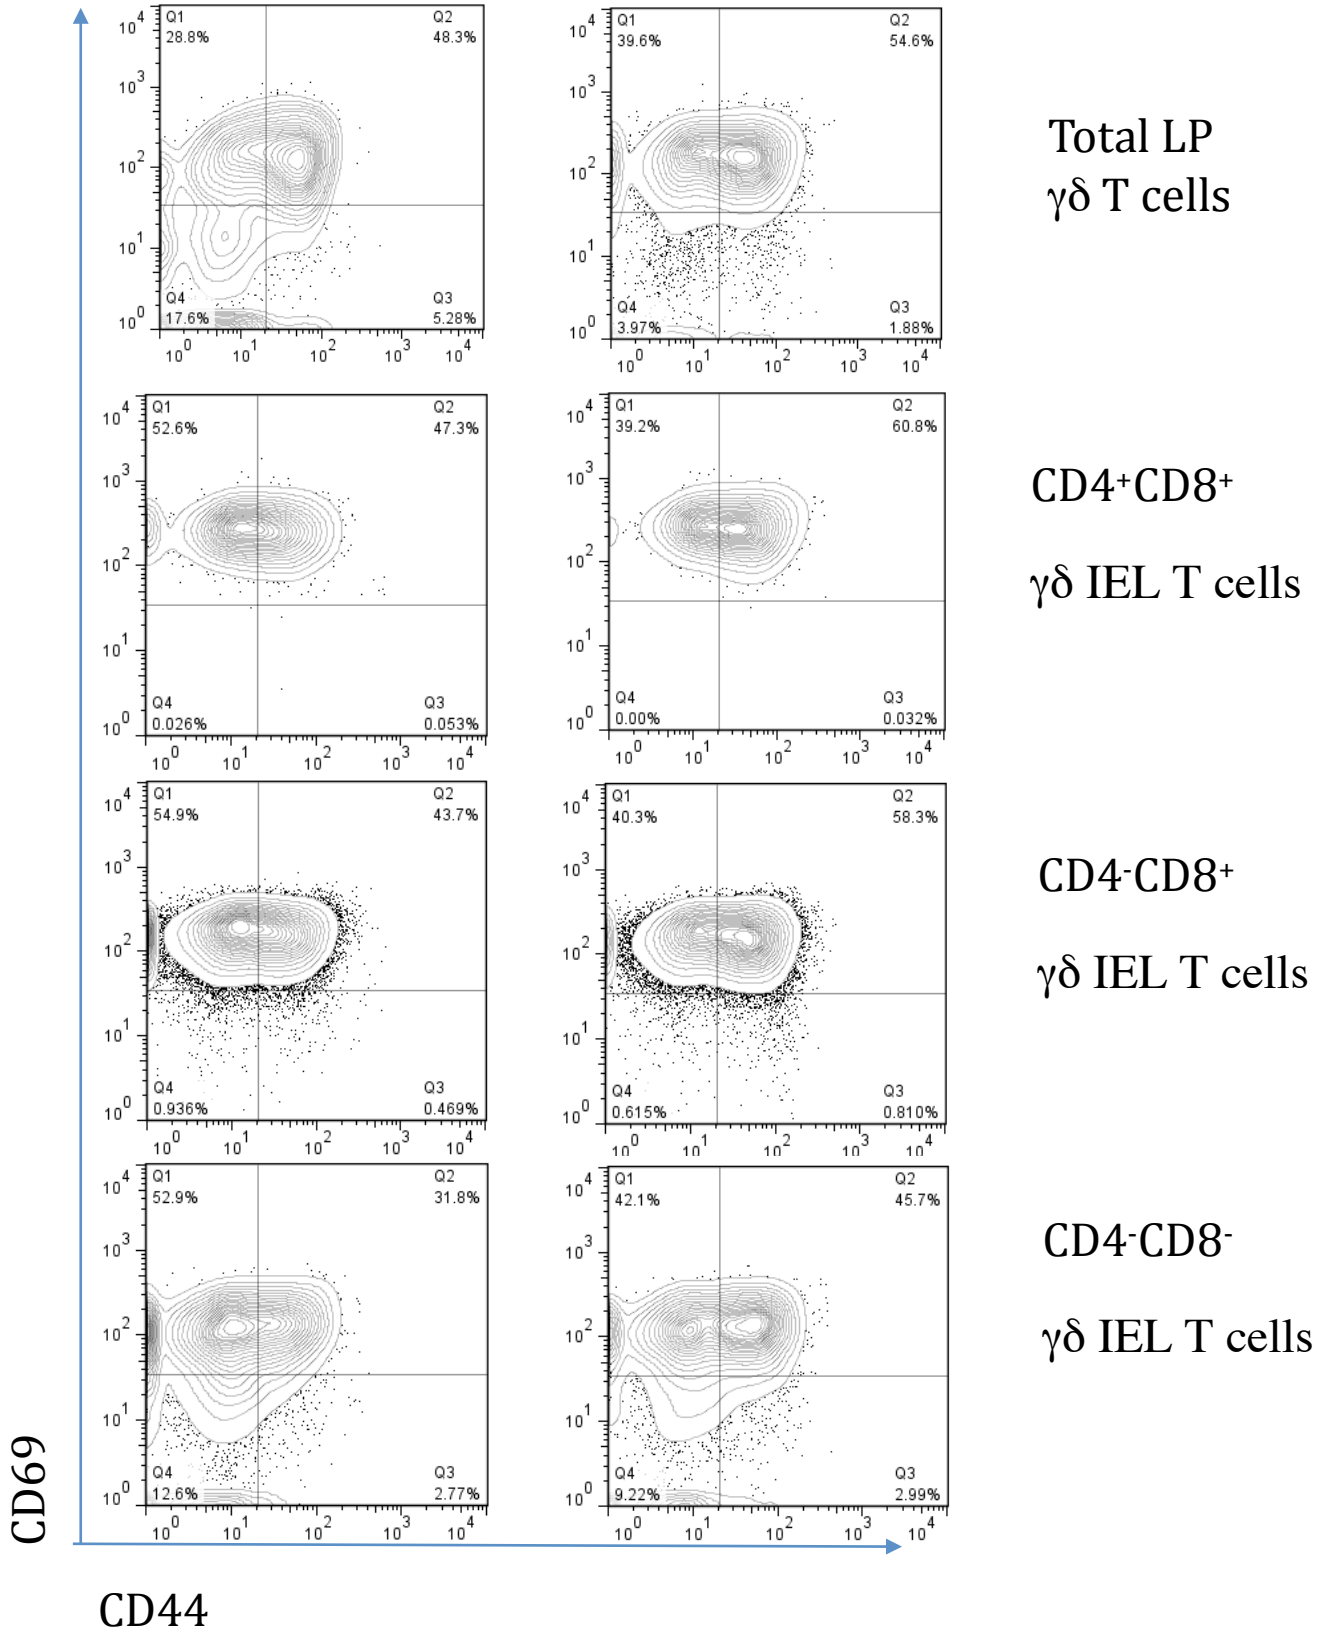

Supplemental Figure 2. Repeat of T cell analysis from uninfected and 7-day infected C57BL/6J mice that received drinking water supplemented with antibiotics. Lamina propria and intraepithelial lymphocytes were pooled and isolated from four mice per group as described in Materials & Methods. Cells were stained with the indicated antibodies. In A and B, total T cells, CD4 and CD8 populations are shown as proportions of all viable LP cells. In C, total T cells, CD4 and CD8 populations are shown as proportions of all viable IEL cells. In D, expression of the activation markers CD44 and CD69 are shown on gated populations of CD4<sup>+</sup> and CD8<sup>+</sup> Tcrβ<sup>+</sup> T cells from both LP and IEL. In E, expression of the activation markers CD44 and CD69 are shown on gated populations of total LP γδ (CD3<sup>+</sup>Tcrβ<sup>-</sup>) T cells and on IEL γδ T cells gated based on expression of CD4 and CD8α.

LP

S3A. Uninfected

Day 7

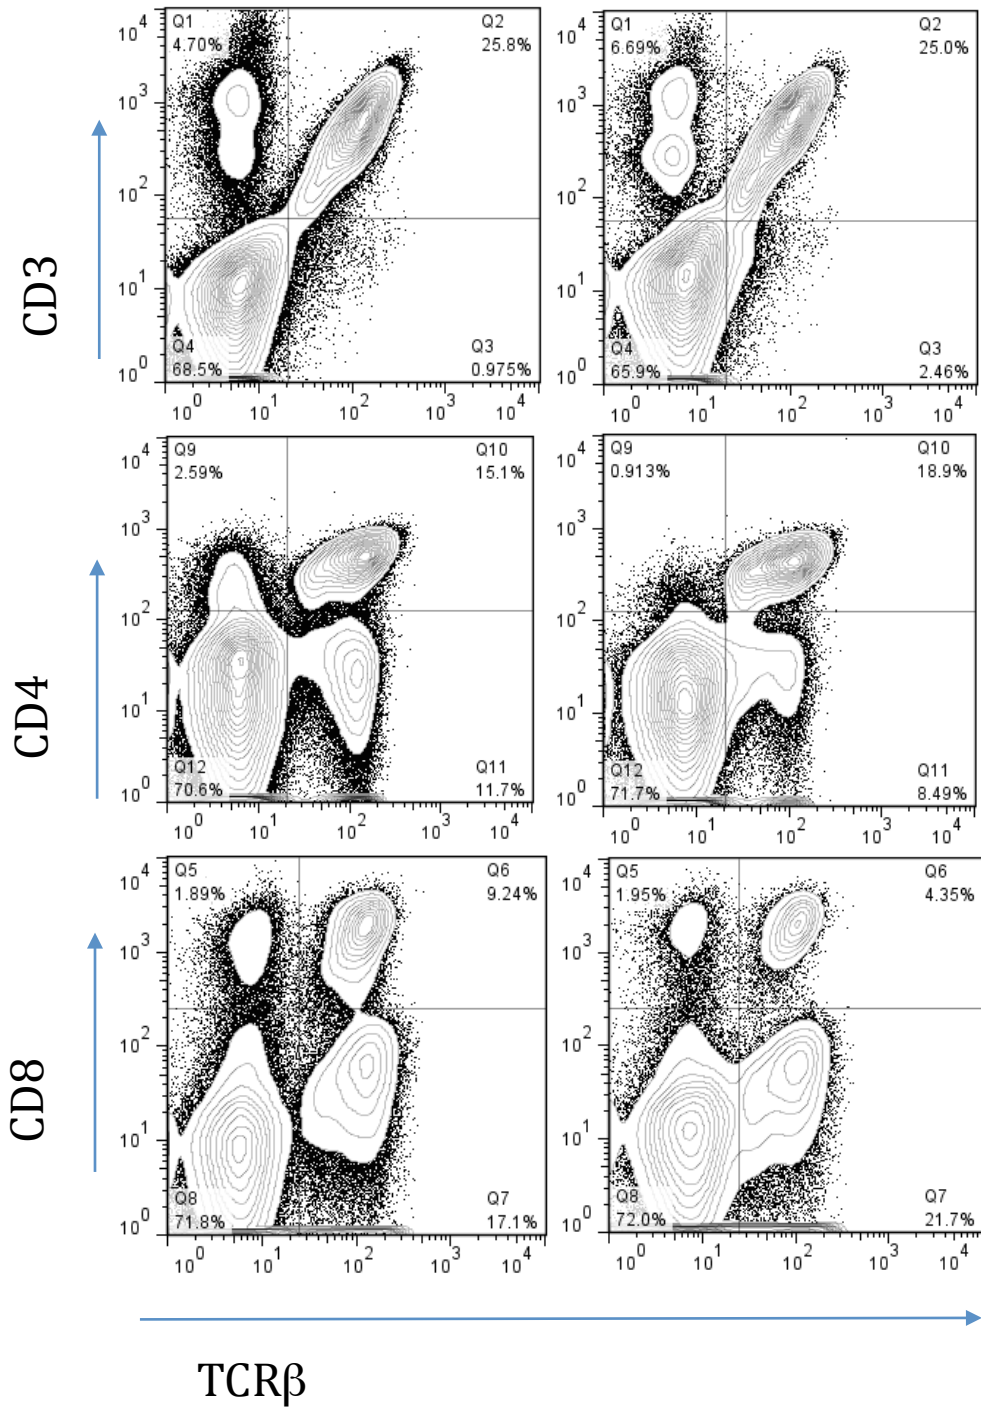

S3B. Uninfected IEL Day 7

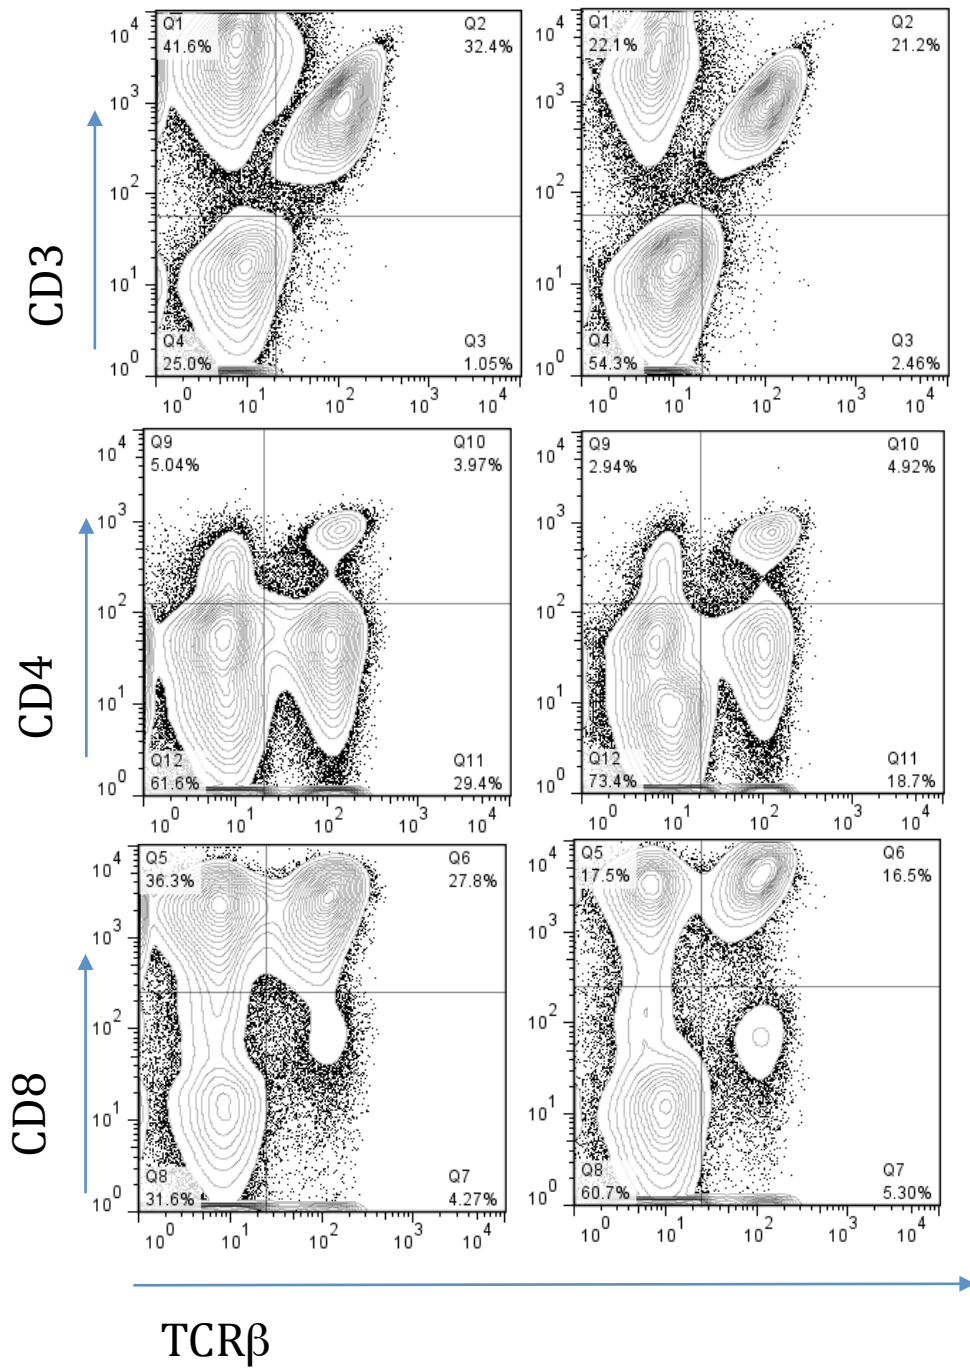

S3C.

Uninfected

Day 7

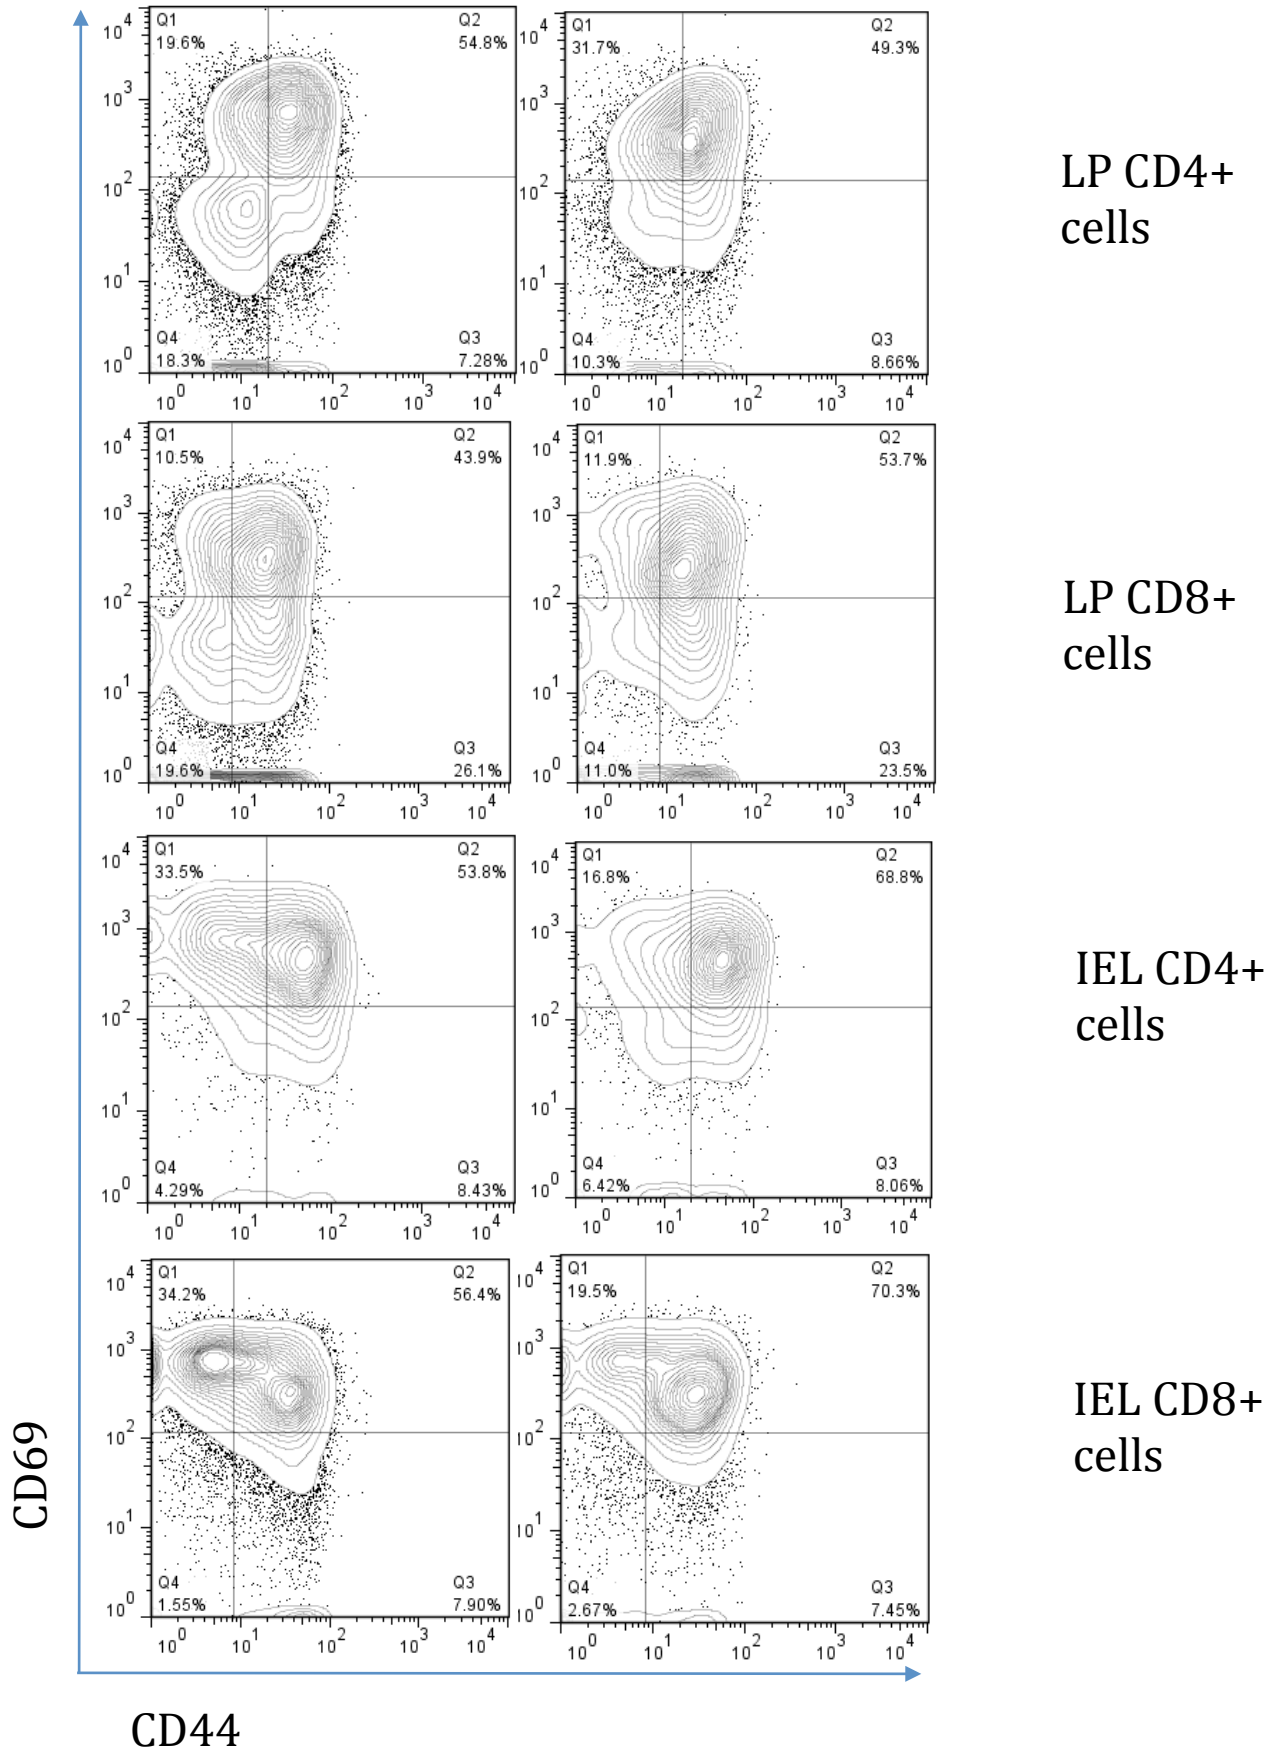

S3D. Uninfected

Day 7

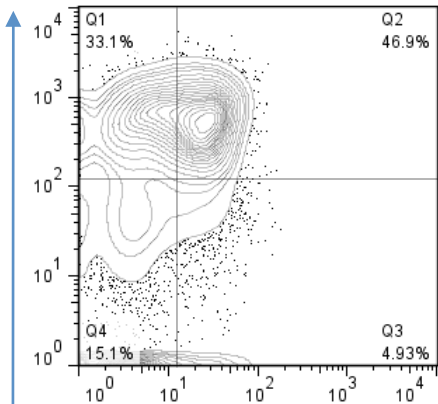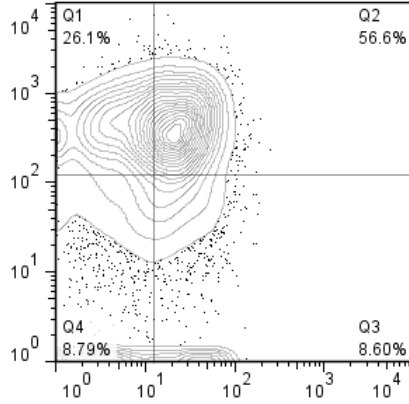

Total LP  
 $\gamma\delta$  T cells

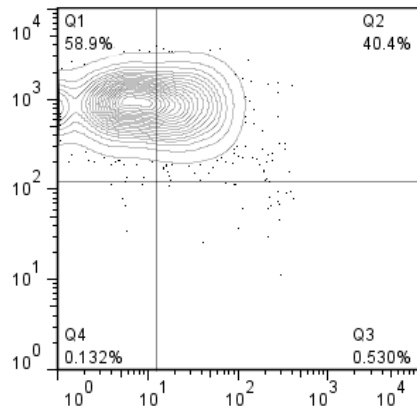

IEL  $\gamma\delta$   
CD4+CD8+  
T cells

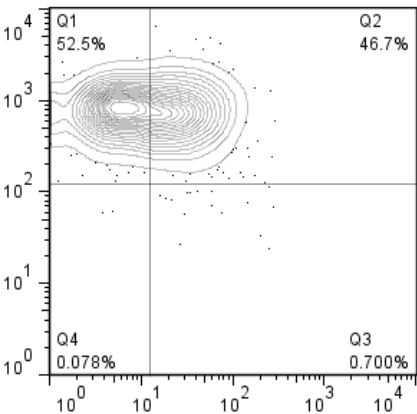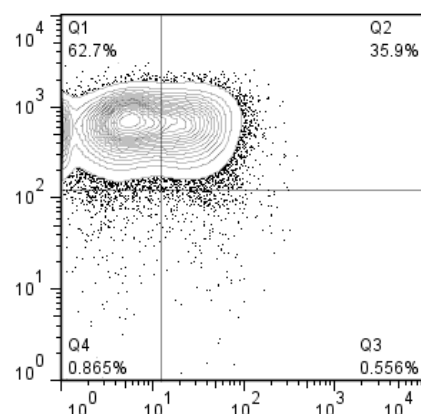

IEL  $\gamma\delta$   
CD4-CD8+  
T cells

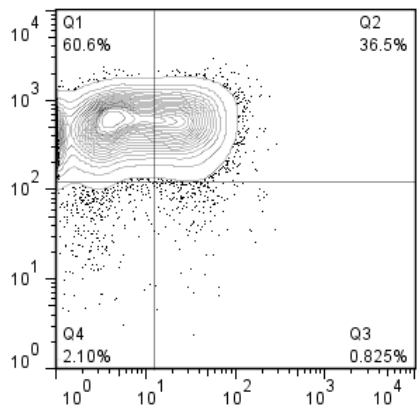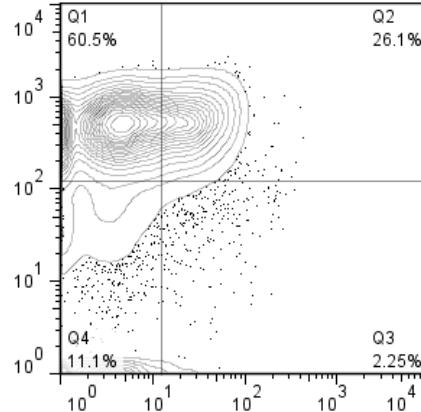

IEL  $\gamma\delta$   
CD4-CD8-  
T cells

CD69

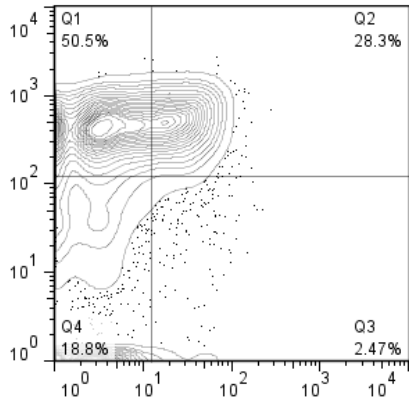

CD44

Supplemental Figure 3. Repeat of T cell analysis from uninfected and 7-day infected C57BL/6J mice who received drinking water supplemented with antibiotics. Lamina propria and intraepithelial lymphocytes were pooled and isolated from four mice per group as described in Materials & Methods. Cells were stained with the indicated antibodies. In A, total T cells, CD4 and CD8 populations are shown as proportions of all viable LP cells. In B, total T cells, CD4 and CD8 populations are shown as proportions of all viable IEL cells. In C, expression of the activation markers CD44 and CD69 are shown on gated populations of CD4<sup>+</sup> and CD8<sup>+</sup> Tcr $\beta$ <sup>+</sup> T cells from both LP and IEL. In D, expression of the activation markers CD44 and CD69 are shown on gated populations of total LP  $\gamma\delta$  (CD3<sup>+</sup>Tcr $\beta$ <sup>-</sup>) T cells and on IEL  $\gamma\delta$  T cells gated based on expression of CD4 and CD8 $\alpha$ .



S4A.

# FasL

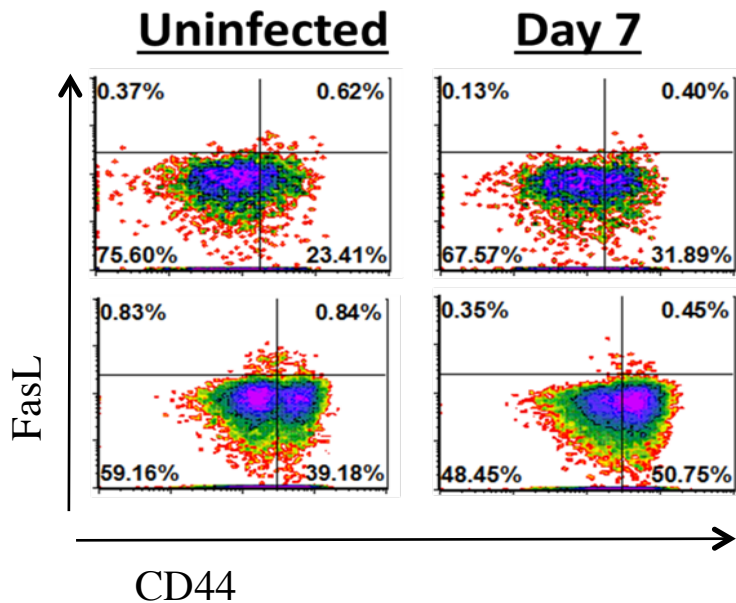

CD4<sup>+</sup> αβ LP  
T cells

CD8<sup>+</sup> αβ LP  
T cells

S4B.

# TRAIL

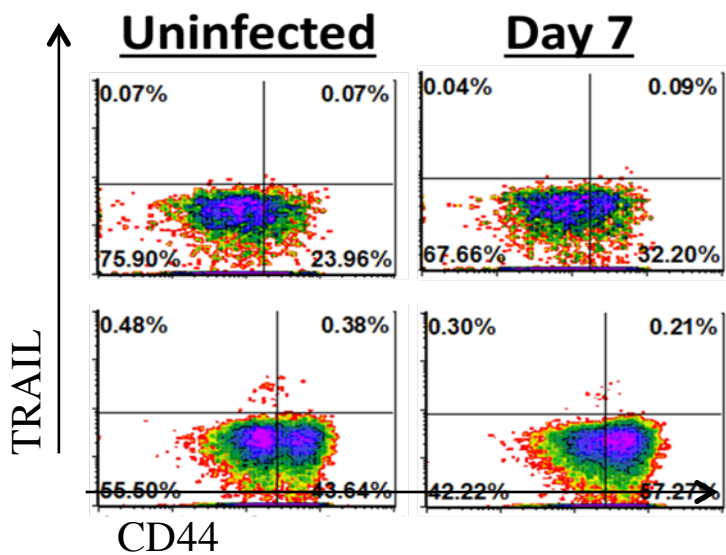

CD4<sup>+</sup> αβ LP  
T cells

CD8<sup>+</sup> αβ LP  
T cells

Supplemental Figure 4. Lamina propria lymphocytes were isolated from day 7 infected C57BL/6J mice as described in material and methods. Small intestines from four mice were pooled for each group. Expression of CD44 and FasL (A) or TRAIL (B) are shown for live cells gated as CD3<sup>+</sup>, Tcrβ<sup>+</sup>, and either CD4<sup>+</sup> or CD8<sup>+</sup> as indicated.
